# Supplementary material
Source: PubMed Central journal article supplement (PMC3308819)
Supplement: supp_M111.284927_jbc.M111.284927-1.pdf [file supp_M111.284927_jbc.M111.284927-1.pdf]

## Supplementary Figure 1

Prediction(s) from PHYRE server

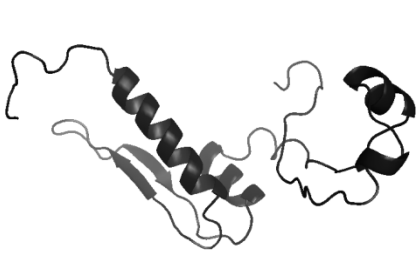

**1ea6**

$R_G$  – 21.1 Å

$D_{max}$  – 75.3 Å

Helix – 26 %

Sheet – 10 %

Residues – 60-173

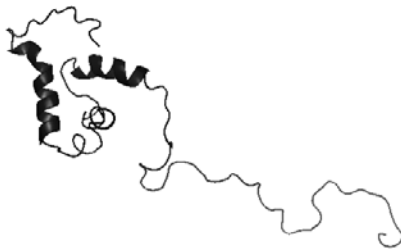

**1jvr**

$R_G$  – 30.3 Å

$D_{max}$  – 108.6 Å

Helix – 23%

Sheet – 6 %

Residues – 176-283

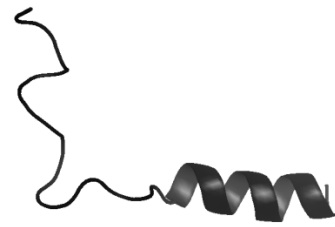

**1cw5**

$R_G$  – 14.9 Å

$D_{max}$  – 47 Å

Helix- 39 %

Sheet – 0%

Residues – 283-310

Prediction(s) from FUGUE server

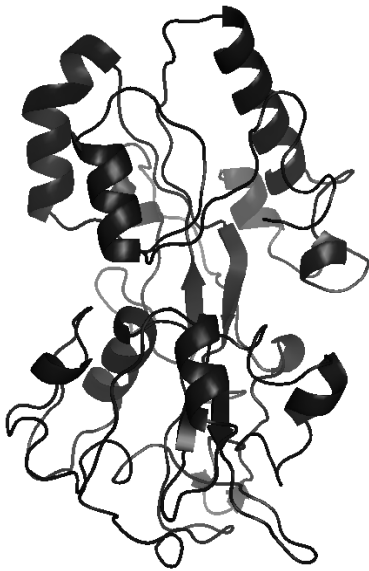

**2v3q**

$D_{max}$  – 71 Å

$R_G$  – 21 Å

Helix- 25 %

Sheet – 15 %

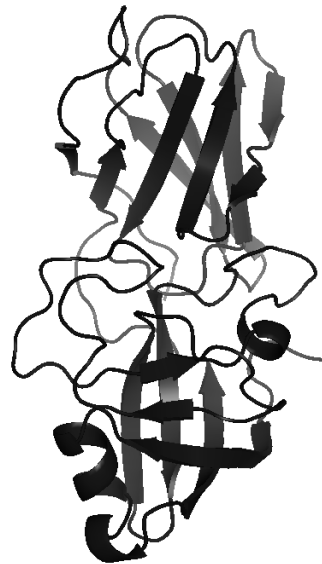

**3d30**

$D_{max}$  – 61 Å

$R_G$  – 18 Å

Helix- 5 %

Sheet – 35 %

Predictions from PHYRE and FUGUE servers (with their templates) are shown. The calculated  $D_{max}$ ,  $R_G$  and secondary structure content is listed below the respective models.

## Supplementary Figure 2

Mass spectra of tagless Neph1-CD protein

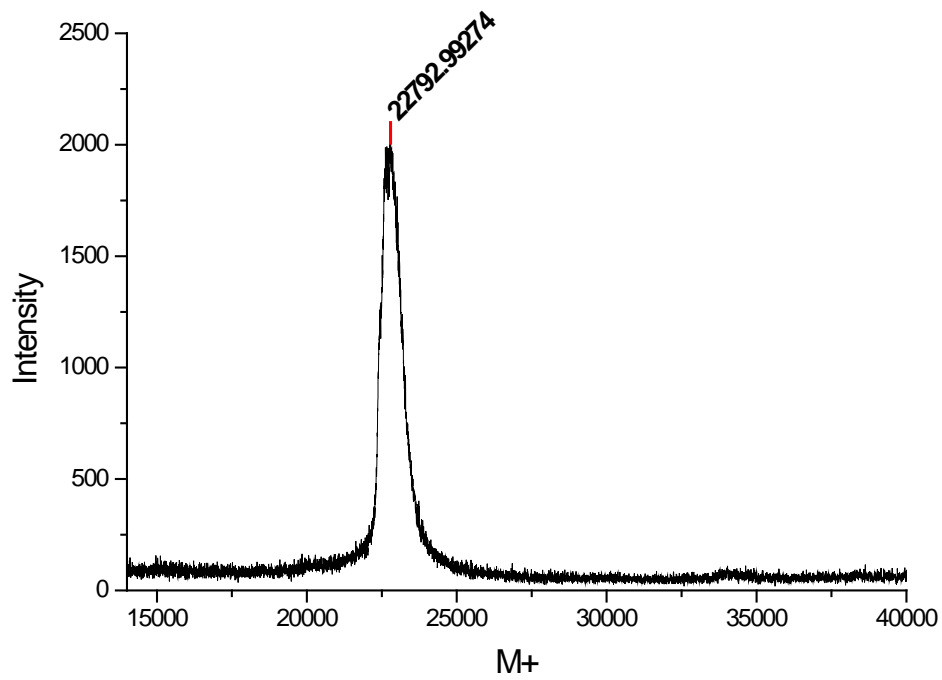

MALDI-TOF result from the sample that was obtained from the proteolysis of His-Neph1-CD is shown. A single peak around 22.7 kDa was observed and the 35 kDa peak corresponding to the parent protein was absent.

### Supplementary Figure 3

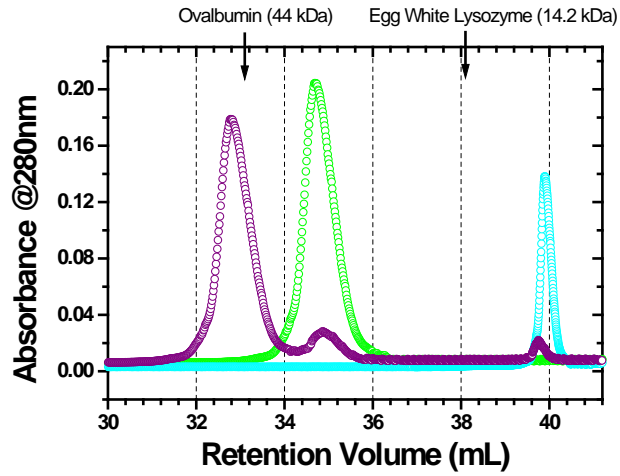

Gel filtration profiles of 0.5 mg/ml samples of His-Neph1-CD (green), His-ZO-1-PDZ1 (cyan) and their 1:1 equimolar mixture (purple) obtained using two Superdex200 columns connected in tandem. The UV-Vis detector was connected at the exit point (within 50  $\mu$ L) of the second column.

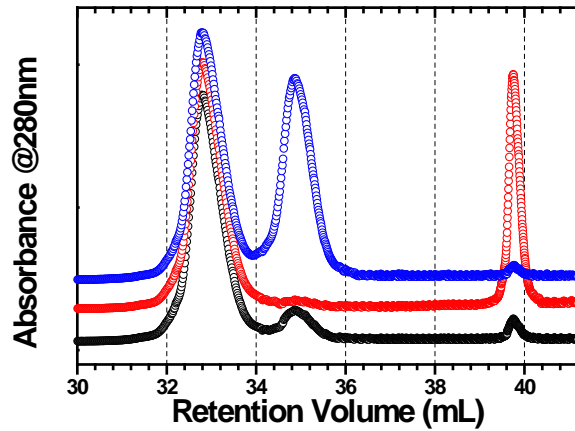

Gel filtration profile of 1:1 (black), 1:2 (red) and 2:1 (blue) molar mixtures of His-Neph1-CD-ZO-1-PDZ1 using the FPLC set-up described above.

Supplementary Figure 4

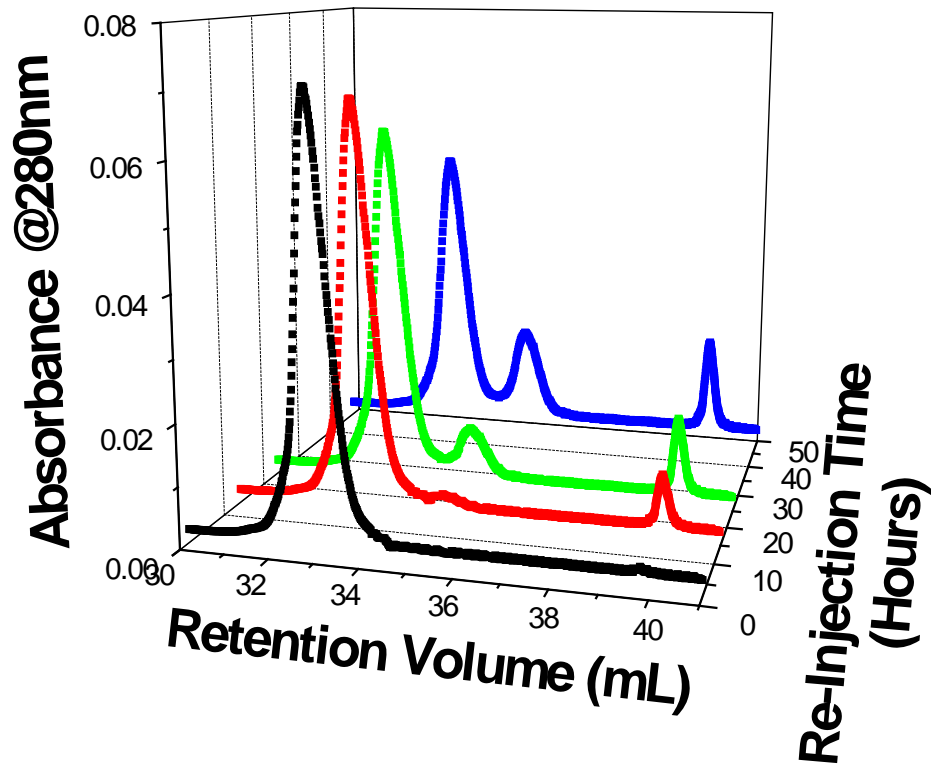

The gel filtration profile of 1:1 equimolar His-Neph1-CD-ZO-1-PDZ1 complex purified from FPLC and re-injected on the columns after 2 hours (black), 14 hours (red), 24 hours (green) and 48 hours (blue). The FPLC was carried out using the set-up described in Supplementary Figure 3.

### Supplementary Figure 5

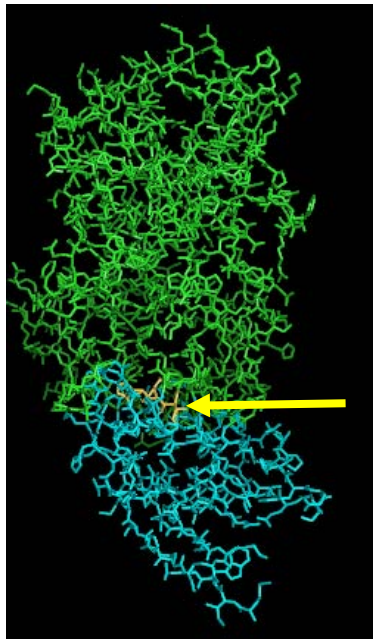

$\chi^2$  1.7 (Selected as model of complex in this work)

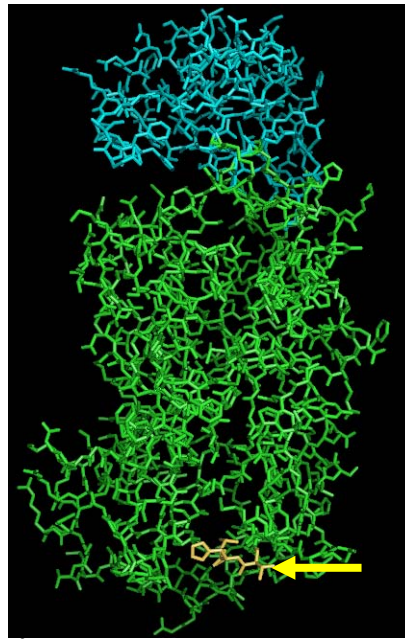

$\chi^2$  2.8

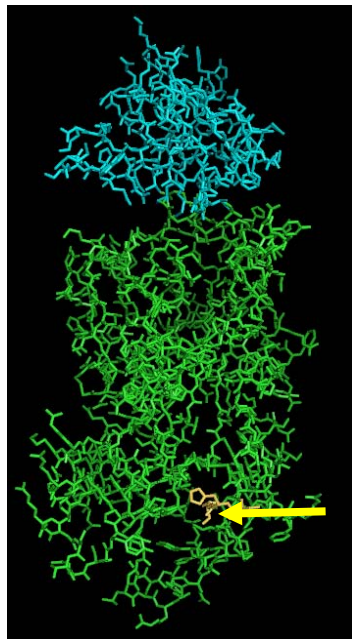

$\chi^2$  2.9

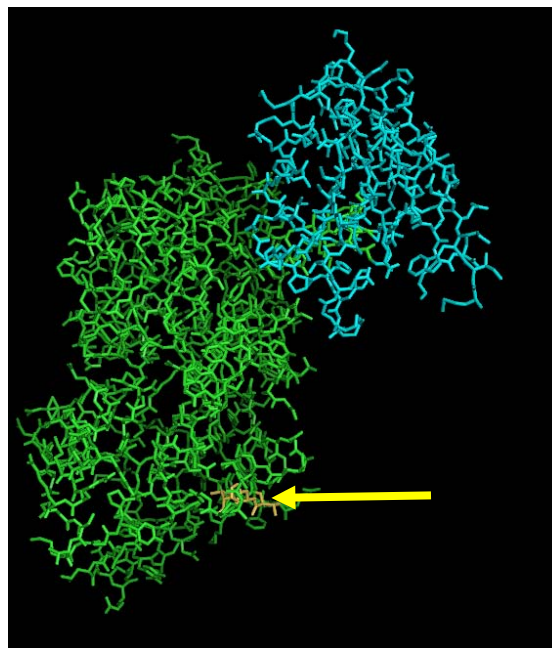

$\chi^2$  4.5

The various relative orientations of His-Neph1-CD and ZO-1-PDZ1, computed by SASREF program are shown. The similarity of theoretical SAXS profile of the respective model to the measured data is reflected in the computed  $\chi^2$  value (listed below each figure). The coordinates for the His-Neph1-CD (modeled structure) and ZO-1-PDZ1 (Crystal Structure) are represented in green and cyan respectively. The C-terminal residues “THV” in Neph1 are highlighted in yellow (also indicated by the arrow).

Supplementary Figure 6

A.

Purification profile of Neph1CD and its mutants.

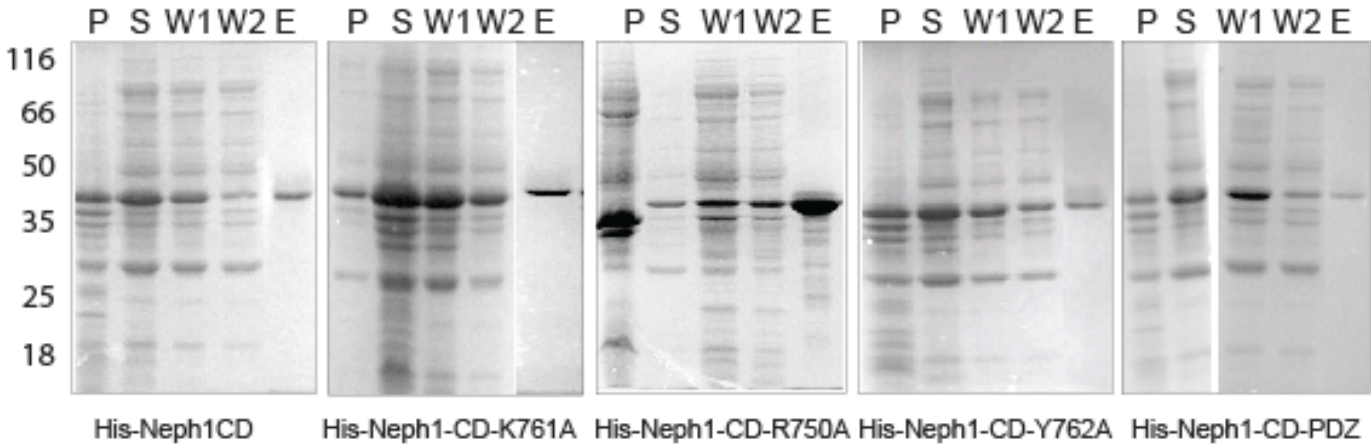

Cytoplasmic domain of Neph1 including wild type and its various mutants were recombinantly expressed in bacteria and purified using Ni-NTA column. P=pellet, S=supernatant, W1=first wash, W2=second wash, E=elute from the column.

B.

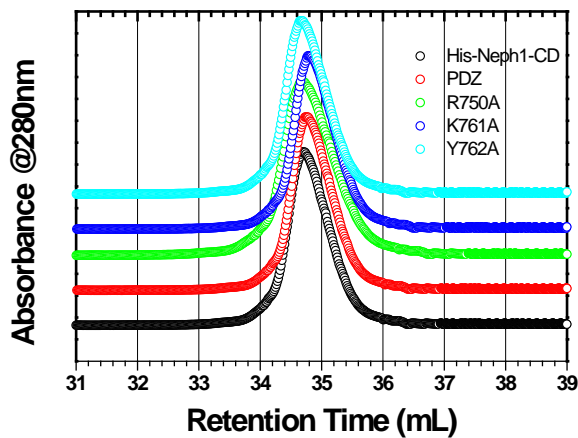

The Gel filtration profile of His-Neph1-CD and its mutants (concentration 0.4-0.7 mg/ml) obtained using the set-up described in Supplementary Figures 3 and 4.

**Supplementary Figure 7**

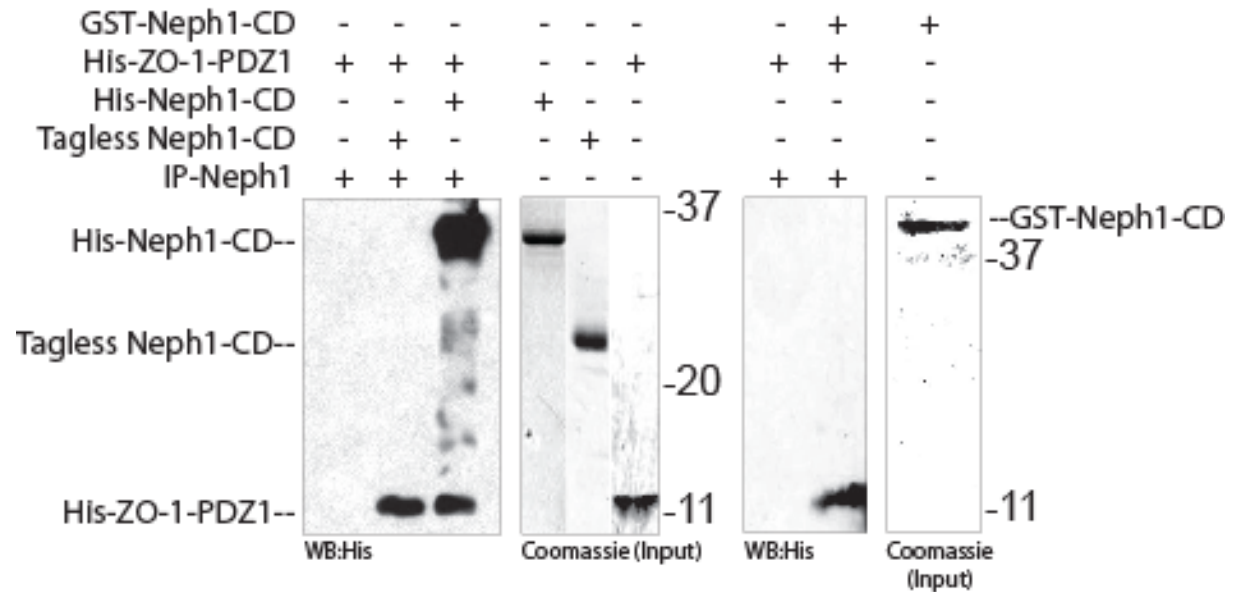

Tagless Neph1 binds His-ZO-1-PDZ1. Equimolar amounts of purified tagless Neph1 protein (cytoplasmic domain) or His-Neph1CD (as positive control) were incubated with purified His-ZO-1-PDZ1 protein and the pull down was performed using Neph1 rabbit polyclonal antibody and the complex was analyzed for the presence of His-ZO-1-PDZ1 using His monoclonal antibody. His-ZO-1-PDZ1 pull down is shown in the left panel (pull down is observed with untagged and His-tagged Neph1CD) and the right panel shows coomassie staining of the input proteins.
